# Supplementary material for: Local cortical pulling-force repression switches centrosomal centration and posterior displacement in C. elegans
Source: PubMed Central journal article supplement — J Cell Biol. 2007 Dec 31;179(7):1347–54. doi: 10.1083/jcb.200706005 (PMC2373484; doi:10.1083/jcb.200706005), 2007-12-31
Supplement: jcellbiol_jcb.200706005_8.pdf [file jcellbiol_jcb.200706005_8.pdf]

Table S1. **Simulation parameters**

| Parameter description                                                                            | Simulation | Experimental result | Reference <sup>a</sup> |
|--------------------------------------------------------------------------------------------------|------------|---------------------|------------------------|
| Shape of embryo                                                                                  |            |                     |                        |
| Long axis of egg [ $\times 10^{-6}$ m]                                                           | 50         |                     |                        |
| Short axes of egg [ $\times 10^{-6}$ m]                                                          | 30         |                     |                        |
| Radius of pronucleus [ $\times 10^{-6}$ m]                                                       | 5          |                     |                        |
| MT dynamics                                                                                      |            |                     |                        |
| Growth velocity of MT ( $V_g$ ) [ $\times 10^{-6}$ m/s] <sup>b</sup>                             | 0.328      | 0.118–0.8           | Srayko et al., 2005    |
| Shrinkage velocity of MT ( $V_s$ ) [ $\times 10^{-6}$ m/s] <sup>b</sup>                          | 0.537      | 0.157–0.537         | Kozlowski et al., 2007 |
| Catastrophe frequency of MT ( $f_{cat}$ ) [1/s] <sup>b</sup>                                     | 0.046      | 0.0115–0.046        |                        |
| Rescue frequency of MT ( $f_{res}$ ) [1/s] <sup>b</sup>                                          | 0.133      | 0.0113–0.133        |                        |
| Number of MT fibers <sup>b</sup>                                                                 | 208        | –300                | Srayko et al., 2005    |
| Pulling force                                                                                    |            |                     |                        |
| 1                                                                                                | 1.1        | 0.78–1.1            |                        |
| Maximum velocity of motor ( $V_{max}$ ) [ $\times 10^{-6}$ m/s]                                  | 2.0        | 1.1–2.0             |                        |
| Density of motors on MT ( $D$ ) [ $\times 10^3$ /m] <sup>b</sup>                                 | 5          | NA                  |                        |
| Ratio of number of motors on anterior and posterior cortexes                                     | 2:3        | 2:3                 | Grill et al., 2003     |
| Expected number of associating motors when an MT reaches the anterior cortex [1/s] <sup>b</sup>  | 0.8        | NA                  |                        |
| Drag force of centrosome complexes                                                               |            |                     |                        |
| Viscosity of cytosol ( $\eta$ ) [N-s/m <sup>2</sup> ]                                            | 1          | 0.9–1.1             | Daniels et al., 2006   |
| Stokes' radius of the centrosome-containing complexes ( $r$ ) [ $\times 10^{-6}$ m] <sup>c</sup> | 10         | 5–15                |                        |
| Model-specific parameter                                                                         |            |                     |                        |
| Time step [s]                                                                                    | 0.05       |                     |                        |

NA, not applicable.

<sup>a</sup>Only references that do not appear in Kimura and Onami, 2005 are shown.

<sup>b</sup>See Materials and methods for choice of parameters.

<sup>c</sup>Stokes' radius of the centrosome-containing complexes (pronucleus and mitotic spindle) was estimated such that its value was between the radius of the pronucleus/spindle and the short radius of the egg because MTs associated with the pronucleus increase the drag force on the pronucleus (Reinsch and Gönczy, 1998).

## References

- Daniels, B.R., B.C. Masi, and D. Wirtz. 2006. Probing single-cell micromechanics in vivo: the microrheology of *C. elegans* developing embryos. *Biophys. J.* 90:4712–4719.
- Grill, S.W., J. Howard, E. Schaffer, E.H. Stelzer, and A.A. Hyman. 2003. The distribution of active force generators controls mitotic spindle position. *Science.* 301:518–521.
- Kimura, A., and S. Onami. 2005. Computer simulations and image processing reveal length-dependent pulling force as the primary mechanism for *C. elegans* male pronuclear migration. *Dev. Cell.* 8:765–775.
- Kozlowski, C., M. Srayko, and F. Nedelec. 2007. Cortical microtubule contacts position the spindle in *C. elegans* embryos. *Cell.* 129:499–510.
- Reinsch, S., and P. Gönczy. 1998. Mechanisms of nuclear positioning. *J. Cell Sci.* 111:2283–2295.
- Srayko, M., A. Kaya, J. Stamford, and A.A. Hyman. 2005. *Dev. Cell.* 9:223–236.
